# Supplementary material for: Chromosomal Microarray Analysis versus Karyotyping in Fetuses with Increased Nuchal Translucency
Source: PubMed Central journal article supplement (PMC6473420; doi:10.3390/medsci7030040), 2019-02-27
Supplement: medsci-07-00040-s001.pdf [file medsci-07-00040-s001.pdf]

**Table S1.** Copy number variants detected in fetuses with isolated NT  $\geq 3.5$  mm.

| ID   | Pathogenic CNVs                      | Description and size of CNVs                                                                                             |
|------|--------------------------------------|--------------------------------------------------------------------------------------------------------------------------|
| 8175 | 18p11.32p11.21(146,484_14,117,327)x1 | 13.97 Mb Deletion due to an unbalanced de novo translocation containing 44 OMIM genes.                                   |
| 8891 | 8p23.3p23.1(228758_6911631)x1        | 6.68 Mb Deletion, due to de novo 8p rearrangement, containing 16 OMIM genes.                                             |
| 8891 | 8p23.1p11.22(11858401_38964086)x3    | 27 Mb Duplication, due to de novo 8p rearrangement, containing 135 OMIM genes.                                           |
| 9021 | 16p11.2(29652999_30198600)x3 pat     | 545 Kb Duplication, paternal origin, overlapping the critical region for 16p11.2 proximal microdup syndrome (BP4-BP5)    |
| 8521 | 16p11.2(28833437_29046252)x3 dn      | de novo 217 Kb Duplication overlapping the critical region for 16p11.2 distal microdel. syndrome (BP2-BP3).              |
| 7733 | 22q11.2(19010936_20434800)x1 dn      | de novo 1.4 Mb Deletion overlapping the critical region for 22q 11.2 microdeletion syndrome.                             |
| 8442 | 22q11.2(19110226_19854855)x1 dn      | de novo 744 Kb Deletion which partially overlaps the critical region for 22q 11.2 microdeletion syndrome.                |
| 7433 | 1p36.23p36.33(453255_7284,969)x1 dn  | de novo 6.8 Mb Deletion overlapping the critical region for 1p36 microdeletion syndrome.                                 |
| 8009 | 10q26.13q26.3(123190101_135104747)x1 | 12 Mb Deletion, due to maternal balanced translocation, overlapping the critical region for 10q26 microdel. syndrome.    |
| 8009 | 12q23.3q24.33(106838149_132878426)x3 | 26 Mb Duplication, due to maternal balanced translocation, containing <i>PTPN11</i> , <i>TBX3</i> and <i>TBX5</i> genes. |
| 8823 | 1q43(237335376_237418407)x1 dn       | de novo 83 Kb Deletion of the 1q43 region containing the OMIM gene <i>RYR2</i> .                                         |
| 8035 | 1q21.1(145429097_146756493)x3 pat    | 1.3 Mb Duplication, paternal origin, which partially overlaps the critical region for 1q21.1 microdeletion syndrome.     |
|      | <b>Likely pathogenic CNVs</b>        |                                                                                                                          |
| 8968 | 9p24.3(222330_434797)x3 dn           | de novo 212 Kb Duplication containing the OMIM gene <i>DOCK8</i> .                                                       |
| 8875 | 10q21.3(68359435_68415649)x1 pat     | 56 Kb Deletion, paternal origin, containing the OMIM gene <i>CTNNA3</i> .                                                |
| 9001 | Xq28(154124170_154233022)x2 dn       | de novo 109 Kb Duplication of the Xq28 region overlapping part of the OMIM gene <i>F8</i> .                              |
| 8931 | 3p22.1(41695444_41827282)x1 mat      | 132 Kb Deletion, maternal origin, containing the gene <i>ULK4</i> .                                                      |
| 8931 | 20p12.1(15079518_15138764)x1 mat     | 59 Kb Deletion, maternal origin, containing the <i>MACROD2</i> gene.                                                     |
|      | <b>Uncertain CNVs</b>                |                                                                                                                          |
| 8175 | 6q16.1(95588523_95662060)x1 pat      | 73 Kb Deletion, paternal origin.                                                                                         |
| 8968 | 11p14.3(24522033_24617004)x3 mat     | 94 Kb Duplication, maternal origin.                                                                                      |
| 8521 | 2p15(61529343_61564040)x1 mat        | 34 Kb Deletion, maternal origin, containing one OMIM gene.                                                               |
| 8035 | 7q21.11(84709626_84813120)x3 pat     | 103 Kb Duplication, paternal origin, containing one OMIM gene.                                                           |
| 8035 | 12p13.31(7986555_8113851)x3 pat      | 127 Kb Duplication, paternal origin containing 2 OMIM genes.                                                             |
| 8035 | 14q32.33(105103181_105339238)x1 mat  | 236 Kb Deletion, maternal origin, containing 5 OMIM genes.                                                               |
| 8989 | 8q22.2(100072320_100155410)x3 pat    | 83 Kb Duplication, paternal origin, covering part of the gene <i>VPS13B</i> .                                            |
| 9047 | 11p11.2(47940952_48388755)x3 mat     | 447 Kb Duplication, maternal origin, containing one OMIM gene.                                                           |
| 9059 | 16p13.2(8861856_8911369)x1 mat       | 49 Kb Deletion, maternal origin, containing 2 OMIM genes.                                                                |
| 9059 | Xq11.2(64403462_64454070)x0 pat      | 50 Kb Nullisomy in the Xq 11.2 region, paternal origin.                                                                  |
| 8875 | 17p11.2(19515340_19536015)x1 mat     | 20 Kb Deletion, maternal origin.                                                                                         |
| 7642 | 14q11.2(22299149_22968274)x3 pat     | 669 Kb Duplication, paternal origin, containing 2 OMIM genes.                                                            |
| 7642 | 18q21.1(47765082_47953251)x3 mat     | 68 Kb Duplication, maternal origin, containing 2 OMIM genes.                                                             |
| 8130 | 5q23.1(118463732_118610549)x3 pat    | 143 Kb Duplication, paternal origin, containing 2 OMIM genes.                                                            |
| 8130 | 6q16.1(95478783_95554367)x1 mat      | 75 Kb Deletion, maternal origin.                                                                                         |
